# Supplementary figures and images for: X-ray and neural network based in-situ identification of the melt pool during the additivemanufacturing of a stainless steel part
Source: Research Square preprint supplement (doi:10.21203/rs.3.rs-6293661/v1), 2025-04-04

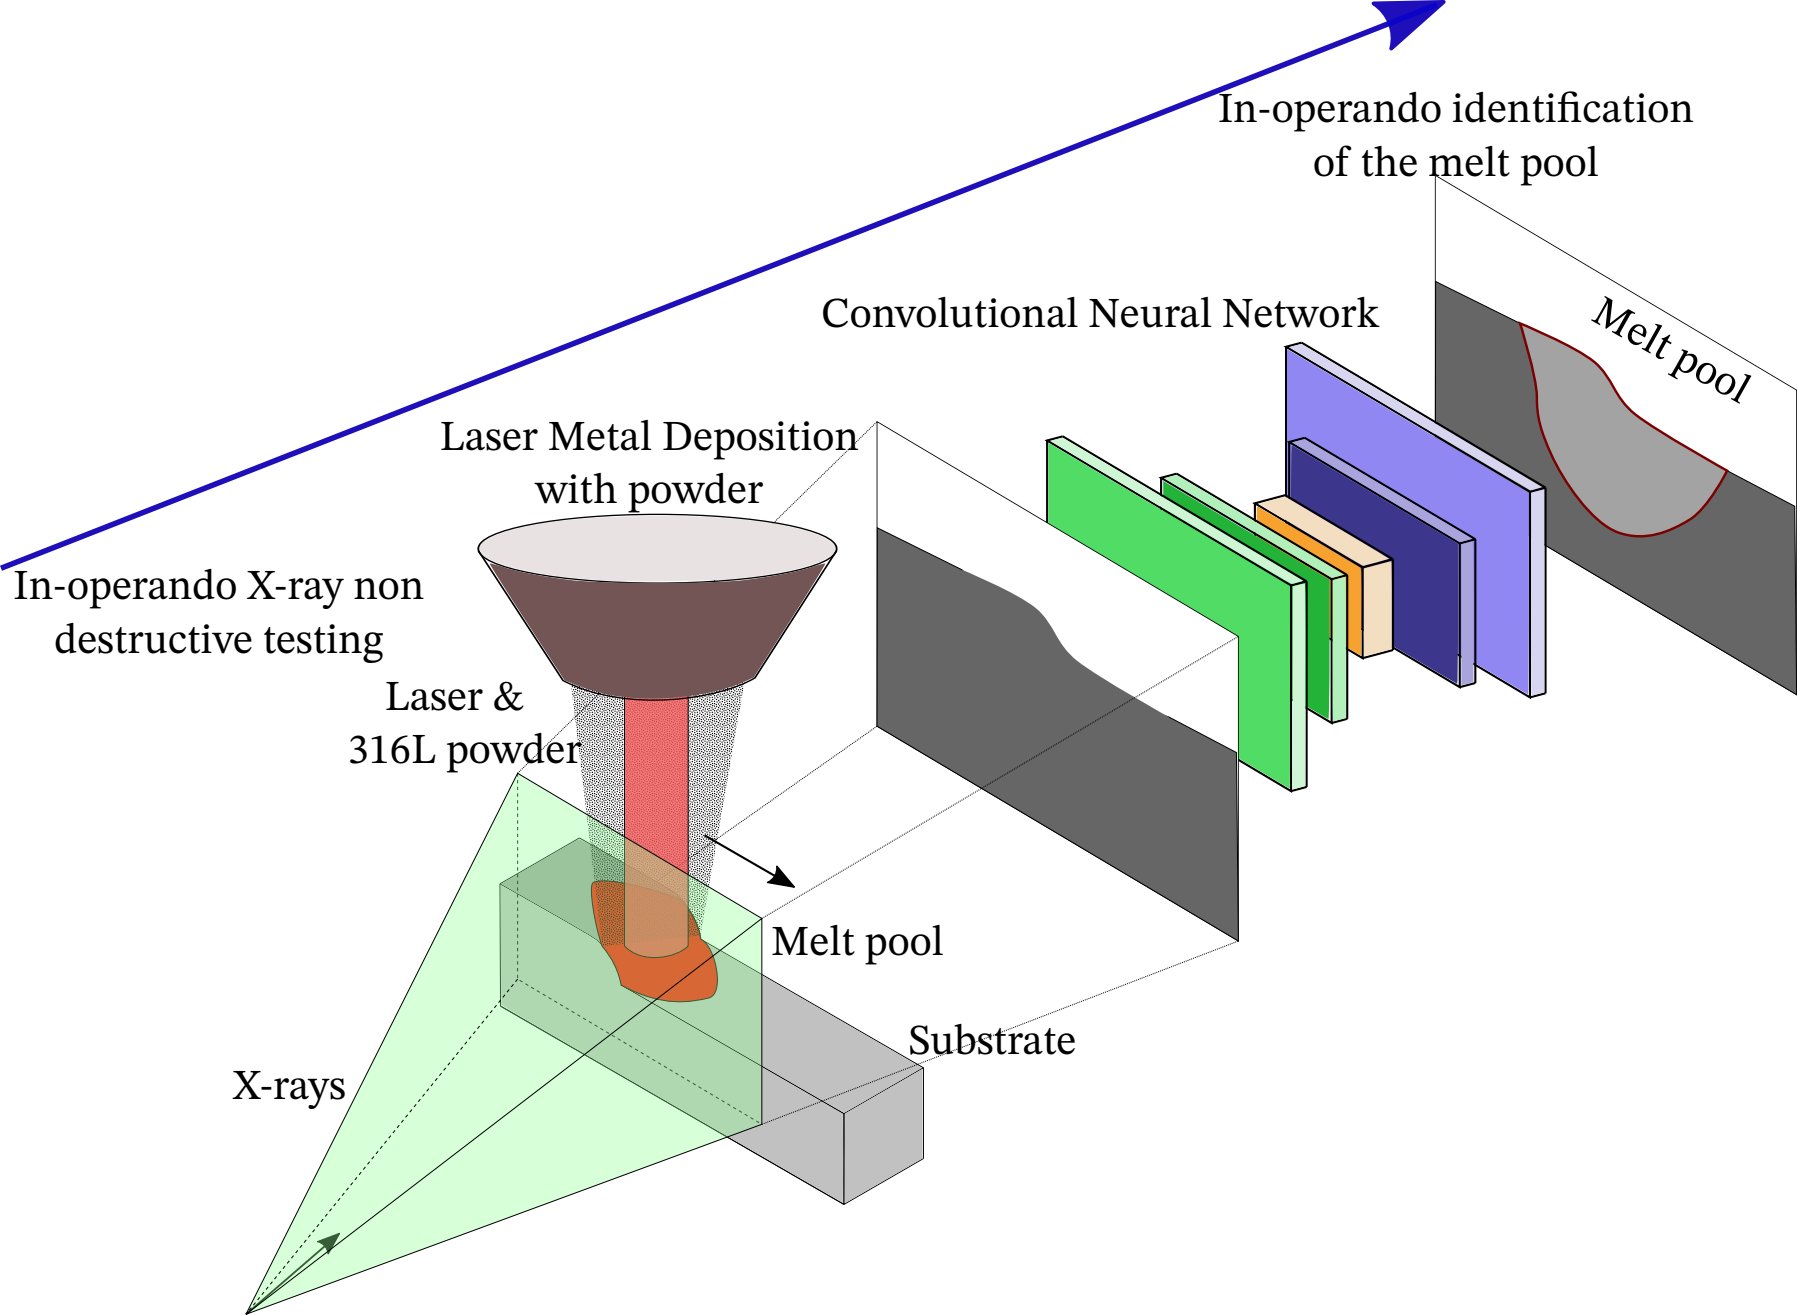

Supplement: Supplementary file 1 [file 8b52557185f83e1e18bd27d9.pdf]
